# Supplementary material
Source: ML conference proceedings conference paper supplement (https://proceedings.neurips.cc/paper_files/paper/2021/hash/2175f8c5cd9604f6b1e576b252d4c86e-Abstract.html)
Supplement: Supplementary file 1 [file 2175f8c5cd9604f6b1e576b252d4c86e-Supplemental.pdf]

## Checklist

1. For all authors...
  - (a) Do the main claims made in the abstract and introduction accurately reflect the paper's contributions and scope? [Yes]
  - (b) Did you describe the limitations of your work? [Yes] We mention that we cannot scale to the same cache sizes as prior work as we do not use a CPU based nearest neighbor task and are thus bounded by accelerator memory.
  - (c) Did you discuss any potential negative societal impacts of your work? [No]
  - (d) Have you read the ethics review guidelines and ensured that your paper conforms to them? [Yes]
2. If you are including theoretical results...
  - (a) Did you state the full set of assumptions of all theoretical results? [Yes]
  - (b) Did you include complete proofs of all theoretical results? [Yes]
3. If you ran experiments...
  - (a) Did you include the code, data, and instructions needed to reproduce the main experimental results (either in the supplemental material or as a URL)? [Yes]
  - (b) Did you specify all the training details (e.g., data splits, hyperparameters, how they were chosen)? [Yes]
  - (c) Did you report error bars (e.g., with respect to the random seed after running experiments multiple times)? [No] It would take too long to run each experiment multiple times.
  - (d) Did you include the total amount of compute and the type of resources used (e.g., type of GPUs, internal cluster, or cloud provider)? [Yes] We mention that we use 8 V2 TPUs, the number of steps, and the steps / second.
4. If you are using existing assets (e.g., code, data, models) or curating/releasing new assets...
  - (a) If your work uses existing assets, did you cite the creators? [Yes]
  - (b) Did you mention the license of the assets? [No]
  - (c) Did you include any new assets either in the supplemental material or as a URL? [Yes]
  - (d) Did you discuss whether and how consent was obtained from people whose data you're using/curating? [N/A]
  - (e) Did you discuss whether the data you are using/curating contains personally identifiable information or offensive content? [N/A]
5. If you used crowdsourcing or conducted research with human subjects...
  - (a) Did you include the full text of instructions given to participants and screenshots, if applicable? [N/A]
  - (b) Did you describe any potential participant risks, with links to Institutional Review Board (IRB) approvals, if applicable? [N/A]
  - (c) Did you include the estimated hourly wage paid to participants and the total amount spent on participant compensation? [N/A]

## Appendix

### 7 Proof of Theorem 2

*Proof.* Let  $e_{q_i} = \phi_Q(q_i; \theta_t)$  be the query embedding,  $e_{z_i} = \phi_D(z_i; \theta_t)$  be the document embedding, and  $e_{z_j} = \phi_D(z_j; \theta_t)$ . Recall that  $\mathcal{E}_1, \mathcal{E}_2, \dots, \mathcal{E}_m$  be the (potentially stale) embeddings in the cache. Let  $s^+ = e_{q_i} \cdot e_{z_i}$ ,  $s_j = e_{q_i} \cdot \phi_D(z_j; \theta_t)$ ,  $\tilde{s}_j = e_{q_i} \cdot \mathcal{E}_j$ .

Recall that

$$\mathcal{L}_{CE_i}(\theta_t) = -\log \left( \frac{\exp(\beta s^+)}{\exp(\beta s^+) + \sum_{j \neq y_i} \exp(\beta s_j)} \right).$$

For simplicity, we use  $\nabla$  and  $\tilde{\nabla}$  to denote  $\nabla \mathcal{L}_{CE_i}(\theta_t)$  and  $\nabla \tilde{\mathcal{L}}_{CE_i}(\theta_t)$  respectively. We first observe that

$$\tilde{\nabla} = \mathbb{E}_J[g_t] = -\beta \nabla s^+ + \sum_j \tilde{p}_j \beta \nabla s_j.$$

This follows as simple consequence of the Gumbel-Max sampling. Furthermore, we have

$$\nabla = -\beta \nabla s^+ + \sum_j p_j \beta \nabla s_j.$$

From the above expression, we have that

$$\begin{aligned} \|\nabla - \tilde{\nabla}\|_2 &= \beta \left\| \sum_j (p_j - \tilde{p}_j) \nabla s_j \right\|_2 \\ &\leq \beta \sum_j |p_j - \tilde{p}_j| \|\nabla s_j\|_2 \\ &\leq \beta M \|p - \tilde{p}\|_1. \end{aligned}$$

The last inequality follows from bounded nature of the score  $\|\nabla s_j\| \leq M$ . Consider a term  $p_j - \tilde{p}_j$ . We have that

$$\begin{aligned} p_j - \tilde{p}_j &= \frac{\exp(\beta s_j)}{\sum_l \exp(\beta s_l)} - \frac{\exp(\beta \tilde{s}_j)}{\sum_l \exp(\beta \tilde{s}_l)} \\ &= \frac{\exp(\beta s_j)}{\sum_l \exp(\beta s_l)} - \frac{\exp(\beta(s_j + (\tilde{s}_j - s_j)))}{\sum_l \exp(\beta(s_l + (\tilde{s}_l - s_l)))} \\ &\leq \frac{\exp(\beta s_j)}{\sum_l \exp(\beta s_l)} (1 - \exp(-\beta \|\tilde{s} - s\|_\infty)) \\ &= p_j (1 - \exp(-2\beta \|\tilde{s} - s\|_\infty)) \\ &\leq 2p_j \beta \|\tilde{s} - s\|_\infty \end{aligned}$$

Similarly, we have that

$$\tilde{p}_j - p_j \leq 2\tilde{p}_j \beta \|\tilde{s} - s\|_\infty.$$

Thus we have that  $|p_i - \tilde{p}_i| \leq 2\beta \|\tilde{s} - s\|_\infty (p_i + \tilde{p}_i)$  and thus

$$\|p - \tilde{p}\|_1 \leq 4\beta \|\tilde{s} - s\|_\infty$$

We bound  $\|\tilde{s} - s\|_\infty$  as follows. Suppose it is at most  $k$  updates since any embedding in  $\mathcal{E}$  has been updated. In particular, let  $t_j$  denote the time step when  $j$  was last updated in  $\mathcal{E}$ . Then, we have

$$\begin{aligned} |\tilde{s}_j - s_j| &= |e_{q_i} \cdot \mathcal{E}_j - e_{q_i} \cdot e_{z_j}| \\ &\leq \|e_{q_i}\|_2 \|\mathcal{E}_j - e_{z_j}\|_2 \\ &\leq \|\mathcal{E}_j - e_{z_j}\|_2 \\ &= \|\phi_D(z_j; \theta_t) - \phi_D(z_j; \theta_{t_j})\| \\ &\leq L \|\theta_t - \theta_{t_j}\| \leq \eta \beta LM (t - t_j) \end{aligned}$$

Thus we have that  $\|\nabla - \tilde{\nabla}\|_2 \leq 4\eta \beta^3 LM^2 k$ . When using the refresh fraction of  $\rho$ , it can be shown the  $k$  is in expectation of the order  $\frac{1}{\rho} - 1$ , which completes the proof.  $\square$

## 8 Proof of Theorem 3

To prove Theorem 3, we start with the following result.

**Lemma 6.** Let  $\mathcal{L} = \frac{1}{m} \sum_{i=1}^m \mathcal{L}_{\text{CE}_i}$ . Assume that a loss function  $\mathcal{L}_{\text{CE}_i}(\theta)$  satisfies:

- (Bounded Gradients) We have that  $\|\mathcal{L}_{\text{CE}_i}(\theta)\| \leq 2M$  for all parameters  $\theta \in \mathbb{R}^p$ .
- (Smoothness) We have that  $\|\nabla \mathcal{L}_{\text{CE}_i}(\theta) - \nabla \mathcal{L}_{\text{CE}_i}(\theta')\|_2 \leq S\|\theta - \theta'\|_2$ .

Furthermore, suppose we run an approximate stochastic gradient descent with stochastic gradient with bounded bias,  $\|\mathbb{E}[g_t | \theta_t] - \nabla \mathcal{L}(\theta_t)\|_2 \leq \Delta_t$ , and additionally  $\|g_t\| \leq M$  for all  $t \in [T]$ . If we update our parameters with a stepsize  $\eta$ , we have that

$$\frac{1}{T} \sum_{t=0}^T \mathbb{E}[\|\nabla \mathcal{L}(\theta_t)\|_2^2] \leq \frac{\mathcal{L}(\theta_0) - \mathcal{L}(\theta^*)}{\eta T} + \frac{1}{2T} \sum_{t=0}^T \Delta_t^2 + 2\eta SM^2.$$

*Proof.* From the Lipschitz continuous nature of the function  $\mathcal{L}$ , we have

$$\begin{aligned} \mathbb{E}[\mathcal{L}(\theta_{t+1})] &\leq \mathbb{E} \left[ \mathcal{L}(\theta_t) + \nabla \mathcal{L}(\theta_t) \cdot (\theta_{t+1} - \theta_t) + \frac{S}{2} \|\theta_{t+1} - \theta_t\|_2^2 \right] \\ &= \mathbb{E} \left[ \mathcal{L}(\theta_t) - \eta \nabla \mathcal{L}(\theta_t) \cdot g_t + \frac{\eta^2 S}{2} \|g_t\|_2^2 \right] \\ &\leq \mathbb{E} \left[ \mathcal{L}(\theta_t) - \eta \|\nabla \mathcal{L}(\theta_t)\|_2^2 - \eta \nabla \mathcal{L}(\theta_t) \cdot \Delta_t \right] + \frac{4\eta^2 SM^2}{2} \\ &\leq \mathbb{E} \left[ \mathcal{L}(\theta_t) - \eta \|\nabla \mathcal{L}(\theta_t)\|_2^2 + \eta \Delta_t \|\nabla \mathcal{L}(\theta_t)\|_2 \right] + 2\eta^2 SM^2. \end{aligned}$$

The second inequality follows from bounded nature of  $g_t$ . The above inequality can be further bounded in the following manner:

$$\begin{aligned} \mathbb{E}[\mathcal{L}(\theta_{t+1})] &\leq \mathbb{E} \left[ \mathcal{L}(\theta_t) - \eta \|\nabla \mathcal{L}(\theta_t)\|_2^2 + \eta \Delta_t \|\nabla \mathcal{L}(\theta_t)\|_2 \right] + 2\eta^2 SM^2 \\ &\leq \mathbb{E}[\mathcal{L}(\theta_t)] - \frac{\eta}{2} \mathbb{E}[\|\nabla \mathcal{L}(\theta_t)\|_2^2] + \frac{\eta}{2} \Delta_t^2 + 2\eta^2 SM^2. \end{aligned}$$

The second inequality follows from the fact that  $ab \leq (a^2 + b^2)/2$ . Summing over all  $t \in [0, T]$  and using telescoping sum, we have

$$\frac{1}{T} \sum_{t=0}^T \mathbb{E}[\|\nabla \mathcal{L}(\theta_t)\|_2^2] \leq \frac{\mathcal{L}(\theta_0) - \mathcal{L}(\theta_T)}{\eta T} + \frac{1}{2T} \sum_{t=0}^T \Delta_t^2 + 2\eta SM^2. \quad (3)$$

This completes the proof of the lemma.  $\square$

We now focus on the proof of Theorem 3..

*Proof.* We first note that under the assumptions of Theorem 3,  $\|\nabla \mathcal{L}_{\text{CE}}(\theta_t)\| \leq 2M$  and  $\|g_t\| \leq 2M$ . This simply follows from the structure of  $\nabla \mathcal{L}_{\text{CE}}$ . Using the above lemma, we have the following:

$$\frac{1}{T} \sum_{t=0}^T \mathbb{E}[\|\nabla \mathcal{L}_{\text{CE}}(\theta_t)\|_2^2] \leq \frac{\mathcal{L}_{\text{CE}}(\theta_0) - \mathcal{L}_{\text{CE}}(\theta^*)}{\eta T} + 8\eta^2 \beta^6 L^2 M^4 \left( \frac{1}{\rho} - 1 \right)^2 + 2\eta SM^2.$$

This follows simply from the bias bounded obtained in Theorem 2. Using  $\eta = \frac{\sqrt{\mathcal{L}_{\text{CE}}(\theta_0) - \mathcal{L}_{\text{CE}}(\theta^*)}}{\sqrt{2TSM}}$  specified in the theorem, we obtain

$$\frac{1}{T} \sum_{t=0}^T \mathbb{E}[\|\nabla \mathcal{L}_{\text{CE}}(\theta_t)\|_2^2] \leq 4M \sqrt{\frac{S(\mathcal{L}_{\text{CE}}(\theta_0) - \mathcal{L}_{\text{CE}}(\theta^*))}{T}} + \frac{4\beta^6 L^2 M^2 (\mathcal{L}_{\text{CE}}(\theta_0) - \mathcal{L}_{\text{CE}}(\theta^*))}{ST} \left( \frac{1}{\rho} - 1 \right)^2.$$

This completes the proof of Theorem 3.  $\square$

## 9 Proof of Lemma 4 and Theorem 5

We use the following lemma in the proof of Lemma 4.

**Lemma 7** (Lemma 5 in [30]). *Given a random variable  $V \geq a > 0$ , we have that*

$$\frac{1}{E[V]} \leq E\left[\frac{1}{V}\right] \leq \frac{1}{E[V]} + \frac{\text{Var}(V)}{a^3}.$$

We now prove Lemma 4.

*Proof.* Our proof follows the proof approach in Theorem 1 in [30], modified to work with an  $\ell_2$  bound on the score gradients and simplified for our sampling scheme.

Assume that the positive element is  $z_1$  and thus the negative elements are  $z_2, \dots, z_m$ .

Let  $U = \exp(\beta s_1)\beta \nabla s_1 + \frac{1}{\alpha} \sum_{j \in \mathcal{S}} \exp(\beta s_j)\beta \nabla s_j$  and  $V = \exp(\beta s^+) + \frac{1}{\alpha} \sum_{j \in \mathcal{S}} \exp(\beta s_j)$ . We have that  $-\beta \nabla s_1 + \frac{E[U]}{E[V]} = \nabla \mathcal{L}_{\mathcal{CE}_i}$  and  $E[g] = -\beta \nabla s_1 + E\left[\frac{U}{V}\right]$ . We thus want to show that  $E\left[\frac{U}{V}\right] \approx \frac{E[U]}{E[V]}$ .

Let  $k_1, k_2, \dots, k_c$  be the  $c$  elements of  $\mathcal{S}$ . We have that

$$\begin{aligned} E\left[\frac{U}{V}\right] &= E\left[\frac{\exp(\beta s_1)\beta \nabla s_1 + \frac{1}{\alpha} \sum_{j=1}^c \exp(\beta s_{k_j})\beta \nabla s_{k_j}}{\exp(\beta s_1) + \frac{1}{\alpha} \sum_{j=1}^c \exp(\beta s_{k_j})}\right] \\ &= \exp(\beta s_1)\beta \nabla s_1 E\left[\frac{1}{V}\right] + E\left[\frac{\frac{1}{\alpha} \sum_{j=1}^c \exp(\beta s_{k_j})\beta \nabla s_{k_j}}{\exp(\beta s_1) + \frac{1}{\alpha} \sum_{j=1}^c \exp(\beta s_{k_j})}\right] \end{aligned} \quad (4)$$

We first bound the first term in Equation (4) from above and below.

We have that  $V \geq m \exp(-\beta)$  and  $\text{Var}(V) \leq c \frac{\exp(2\beta)}{\alpha^2}$ . Thus by Lemma 7 we have that

$$\frac{1}{E[V]} \leq E\left[\frac{1}{V}\right] \leq \frac{1}{E[V]} + \frac{c \frac{\exp(2\beta)}{\alpha^2}}{m^3 \exp(-3\beta)} = \frac{1}{E[V]} + \frac{\exp(5\beta)}{\alpha m^2}.$$

This implies that

$$\frac{\exp(\beta s_1)\beta \nabla s_1}{Z} \leq \exp(\beta s_1)\beta \nabla s_1 E\left[\frac{1}{V}\right] \leq \frac{\exp(\beta s_1)\beta \nabla s_1}{Z} + \frac{\exp(6\beta)\beta |\nabla s_1|}{\alpha m^2} \quad (5)$$

We now bound the second equation in Equation (4).

Let  $S_{c-1} = \sum_{j=1}^{c-1} \exp(\beta s_{k_j})$ . We have that

$$\begin{aligned} E\left[\frac{\frac{1}{\alpha} \sum_{j=1}^c \exp(\beta s_{k_j})\beta \nabla s_{k_j}}{\exp(\beta s_1) + \frac{1}{\alpha} \sum_{j=1}^c \exp(\beta s_{k_j})}\right] &= \frac{c}{\alpha} E\left[\frac{\exp(\beta s_{k_c})\beta \nabla s_{k_c}}{\exp(\beta s_1) + \frac{1}{\alpha} S_{c-1} + \frac{1}{\alpha} \exp(\beta s_{k_c})}\right] \\ &= \frac{c}{\alpha m} \sum_{i=2}^m \exp(\beta s_i)\beta \nabla s_i E\left[\frac{1}{\exp(\beta s_1) + \frac{1}{\alpha} S_{c-1} + \frac{1}{\alpha} \exp(\beta s_i)}\right] \\ &= \sum_{i=2}^m \exp(\beta s_i)\beta \nabla s_i E\left[\frac{1}{\exp(\beta s_1) + \frac{1}{\alpha} S_{c-1} + \frac{1}{\alpha} \exp(\beta s_i)}\right] \end{aligned} \quad (6)$$

Now we have that

$$\begin{aligned} E\left[\exp(\beta s_1) + \frac{1}{\alpha} S_{c-1} + \frac{1}{\alpha} \exp(\beta s_i)\right] &= \exp(\beta s_1) + \frac{c-1}{c} Z^- + \frac{1}{\alpha} \exp(\beta s_i) \\ &= Z - \frac{1}{c} Z^- + \frac{1}{\alpha} \exp(\beta s_i), \end{aligned}$$

where  $Z^-$  is the partition function restricted to just the negatives.

Using  $Z \geq Z^-$  and  $m \exp(-\beta) \leq Z \leq m \exp(\beta)$ , we have that

$$Z \left(1 - \frac{1}{c}\right) \leq Z - \frac{1}{c} Z^- + \frac{1}{\alpha} \exp(\beta s_i) \leq Z \left(1 + \frac{\exp(2\beta)}{c}\right),$$

and thus by Lemma 7 we have that

$$\begin{aligned} \frac{1}{Z} \left(1 - \frac{\exp(2\beta)}{c}\right) &\leq E \left[ \frac{1}{\exp(\beta s_1) + \frac{1}{\alpha} S_{c-1} + \frac{1}{\alpha} \exp(\beta s_i)} \right] \\ &\leq \frac{1}{Z(1 - \frac{1}{c})} + \frac{1}{\alpha^2} \frac{\text{Var}(S_{c-1})}{m^3 \exp(-3\beta)} \\ &\leq \frac{1}{Z(1 - \frac{1}{c})} + \frac{\exp(5\beta)}{\alpha m^2} \\ &\leq \frac{1}{Z} \left(1 + O\left(\frac{1}{c}\right)\right) + \frac{\exp(5\beta)}{\alpha m^2} \\ &= \frac{1}{Z} + \frac{\exp(O(\beta))}{\alpha m^2}. \end{aligned}$$

We conclude that

$$E \left[ \frac{1}{\exp(\beta s_1) + \frac{1}{\alpha} S_{c-1} + \frac{1}{\alpha} \exp(\beta s_i)} \right] = \frac{1}{Z} \pm \frac{\exp(O(\beta))}{\alpha m^2} \quad (7)$$

Continuing Equation (6) by applying Inequality (7), we have that

$$\begin{aligned} E \left[ \frac{\frac{1}{\alpha} \sum_{j=1}^c \exp(\beta s_{k_j}) \beta \nabla s_{k_j}}{\exp(\beta s^+) + \frac{1}{\alpha} \sum_{j=1}^c \exp(\beta s_{k_j})} \right] &= \sum_{i=2}^m \left( \frac{\exp(\beta s_i) \beta \nabla s_i}{Z} \pm \frac{\exp(\beta s_{k_j}) \beta \nabla s_{k_j} \exp(O(\beta))}{\alpha m^2} \right) \\ &= \left( \sum_{i=2}^m \frac{\exp(\beta s_i) \beta \nabla s_i}{Z} \right) \pm \frac{\exp(O(\beta))}{\alpha m^2} \sum_{i=2}^m \exp(\beta s_i) \nabla s_i \\ &= \left( \sum_{i=2}^m \frac{\exp(\beta s_i) \beta \nabla s_i}{Z} \right) \pm \frac{\exp(O(\beta))}{\alpha m^2} \sum_{i=2}^m \nabla s_i. \end{aligned} \quad (8)$$

Combining Inequalities (5) and (8), we have that

$$E \left[ \frac{U}{V} \right] - \frac{E[U]}{E[V]} = \pm \frac{\exp(O(\beta))}{\alpha m^2} \sum_{i=1}^m \nabla s_i,$$

and thus

$$\begin{aligned} \left\| E \left[ \frac{U}{V} \right] - \frac{E[U]}{E[V]} \right\|_2 &= \frac{\exp(O(\beta))}{\alpha m^2} \sum_{i=1}^m \|\nabla s_i\| \\ &= \frac{\exp(O(\beta)) M}{\alpha m}. \end{aligned}$$

□

We can now prove Theorem 5.

*Proof.* We use Theorem 2 to bound the bias due to the staleness of the cache and Lemma 4 to bound the bias due to using a sampled cache. We can then apply Lemma 6 to finish the proof. □
